# Supplementary material for: Development of self-assembled peptide hydrogels containing matrix-metalloproteinase degradable motifs for 3D lung cancer models
Source: Royal Society of Chemistry journal article supplement (doi:10.1039/d5sm00890e), 2026-01-01
Supplement: d5sm00890e1.pdf [file d5sm00890e1.pdf]

## Supporting Information

### Development of self-assembled peptide hydrogels containing matrix-metalloproteinase degradable motifs for 3D lung cancer models

Burcu Sirma Tarım,<sup>a</sup> Sedef Tamburacı<sup>a</sup> and Ayben Top<sup>\*a</sup>

Department of Chemical Engineering, Izmir Institute of Technology, Izmir 35430, Türkiye

\*Corresponding author: E-mail: aybentop@iyte.edu.tr

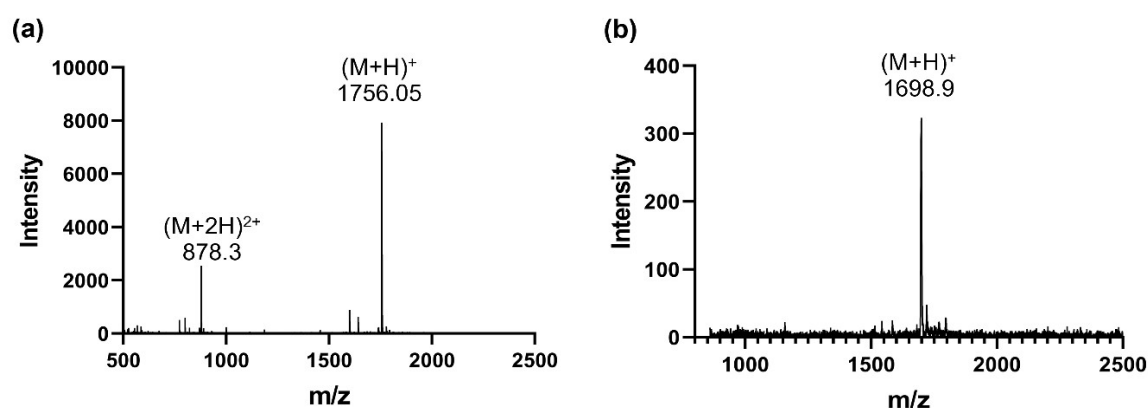

**Fig. S1.** MALDI-TOF mass spectroscopy results of (a) EDP1 and (b) EDP2 peptides.

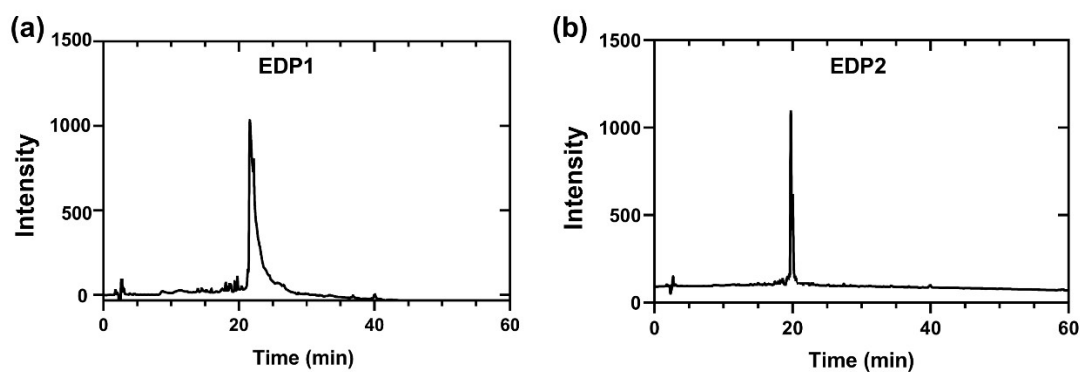

**Fig. S2.** RP-HPLC results of (a) EDP1 and (b) EDP2 peptides.

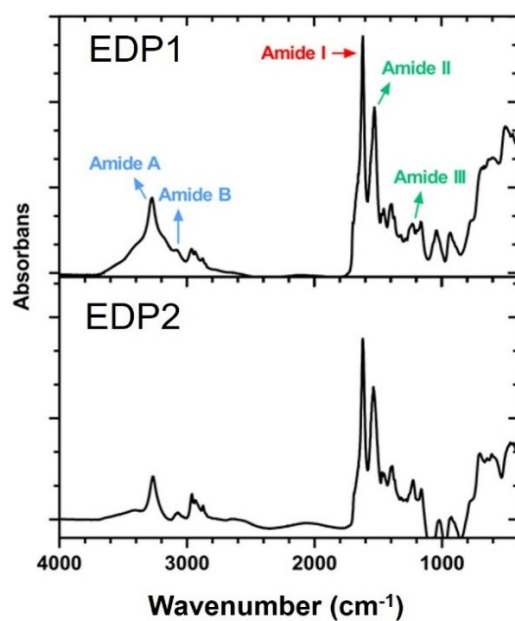

**Fig. S3.** ATR-FTIR spectra of the peptide hydrogels from 4000 to 400  $\text{cm}^{-1}$ .

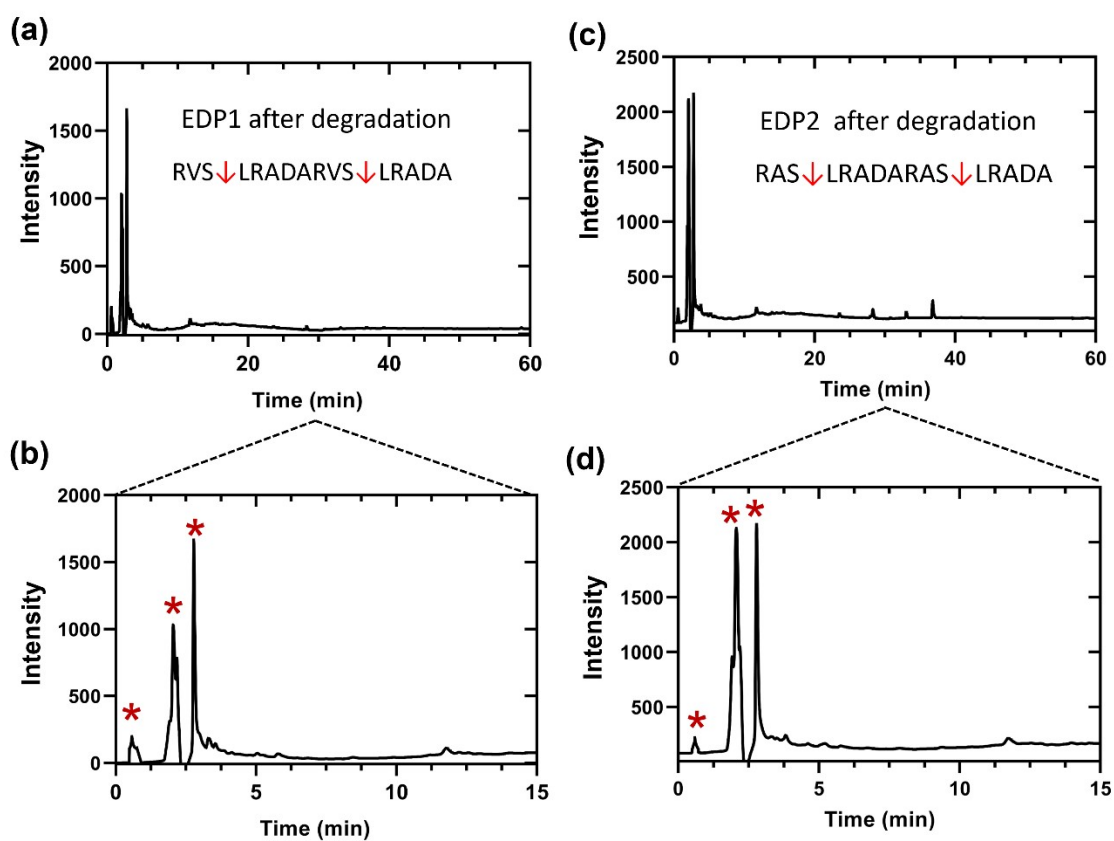

**Fig. S4.** RP-HPLC results of (a-b) EDP1 and (c-d) EDP2 peptides after treatment with MMP-2 for 48 h.

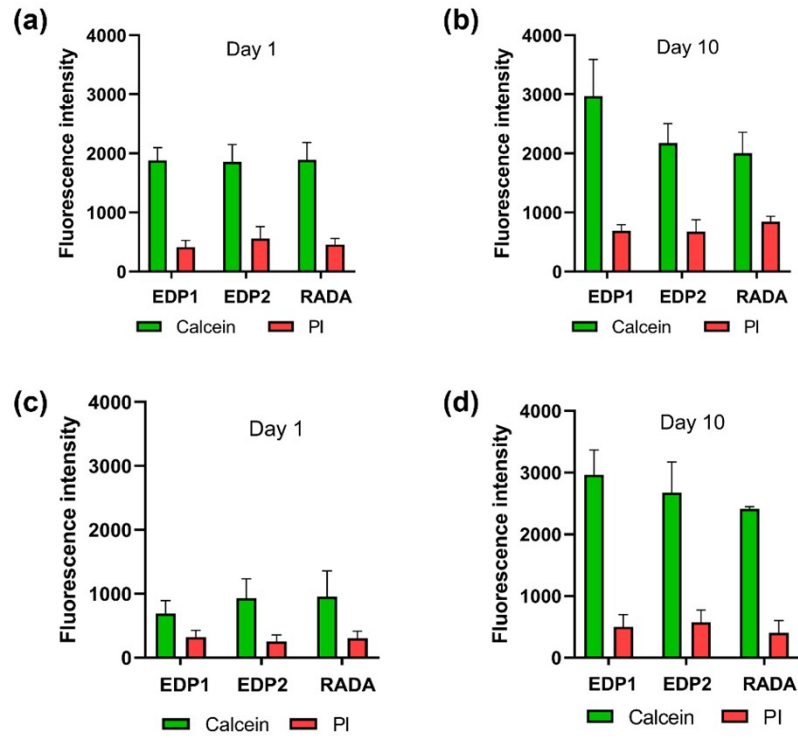

**Fig. S5.** Calcein and PI fluorescence intensities of (a-b) seeded A549 cells after 1 and 10 days, and (c-d) encapsulated A549 cells after 1 and 10 days, respectively.

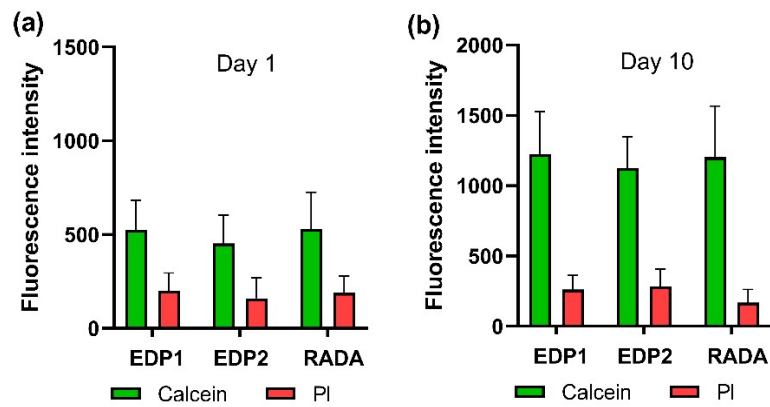

**Fig. S6.** Calcein and PI fluorescence intensities of the stained MRC-5 cells encapsulated in the hydrogels after (a) 1 and (b) 10 day(s) of incubation.

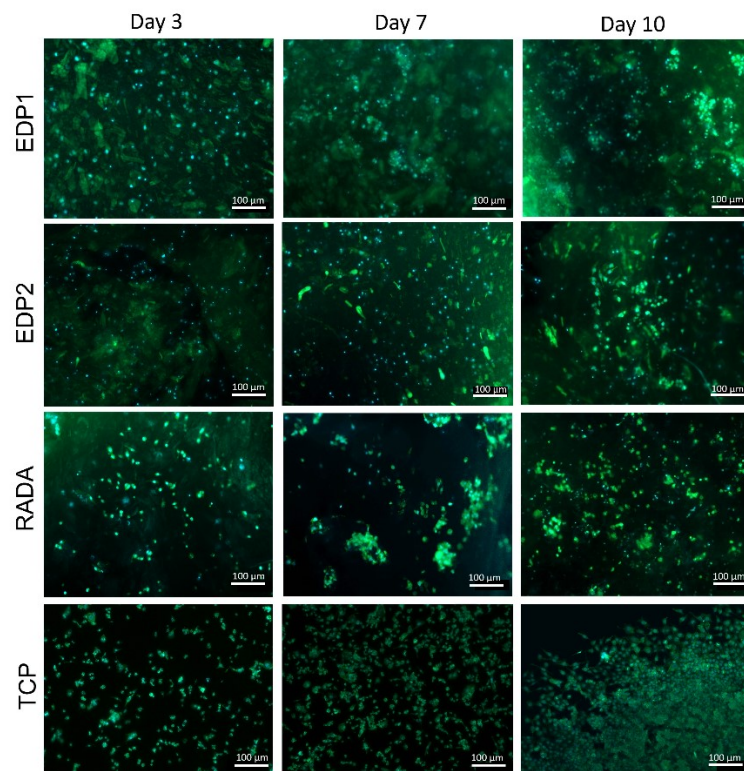

**Fig. S7.** Fluorescence images of DAPI/phalloidin staining of the cells seeded on the hydrogels and TCP surfaces on 3, 7, and 10 days. Scale bars: 100  $\mu\text{m}$ .

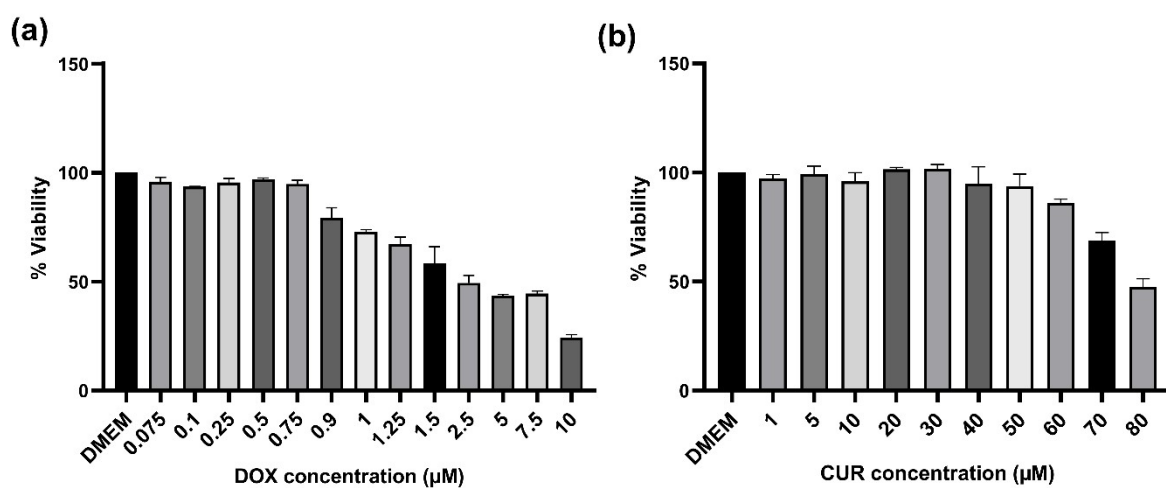

**Fig. S8.** Viability of A549 cells in 2D monolayer after treatment with different concentrations of (a) DOX and (b) CUR for 48 h.

**Table S1.**  
Notatio

| Samples | Peptide sequences | Molar Mass (Da) | Net charge at pH 7.4 |
|---------|-------------------|-----------------|----------------------|
| EDP1    | RVSLRADARVSLRADA  | 1755.0          | 3+                   |
| EDP2    | RASLRADARASLRADA  | 1698.9          | 3+                   |

n, sequences, molar mass and physical properties of the peptides.

**Table S2.** Secondary structure of the peptides estimated using the BestSel program.

| Sample | Helix | Antiparallel | Parallel | Turn | Others | NRMSD  |
|--------|-------|--------------|----------|------|--------|--------|
| EDP1   | 3.9   | 38.5         | 9.8      | 12.6 | 35.2   | 0.0281 |
| EDP2   | 2.1   | 37.2         | 0.0      | 21.0 | 39.7   | 0.0331 |
